# Supplementary material for: Current-Induced Crystallisation in Heusler Alloy Films for Memory Potentiation in Neuromorphic Computation
Source: Research Square preprint supplement (doi:10.21203/rs.3.rs-559371/v1), 2021-05-28
Supplement: Supplementary file 1 [file de438c6c0065fb6054ab74ca.docx]

**Current-Induced Crystallisation in Heusler Alloy Films**

**for Memory Potentiation in Neuromorphic Computation**

William Frost,1), a) Kelvin Elphick,2), b) Marjan Samiepour 2), c) and Atsufumi Hirohata 2), *

1) *Department of Physics, University of York, York YO10 5DD, United Kingdom*

2) *Department of Electronic Engineering, University of York, York YO10 5DD, United Kingdom*

a) *Present Address: Oxford Instruments Plasma Technology, Bristol BS49 4AP, United Kingdom*

b) *Present Address: Taiwan Semiconductor Manufacturing Company, Hsinchu 300-78, Taiwan, R.O.C.*

c) *Present Address: Seagate Technology, Londonderry BT48 0LY, United Kingdom*

* *Corresponding author: E-mail: atsufumi.hirohata@york.ac.uk*

Figure S1 shows the development of giant magnetoresistive (GMR) behaviour by an applied current of 50 µA for 1 s up to 45 times. The noise decreases with increasing the current application, proving the Co2FeAl0.5Si0.5 (CFAS) Heusler-alloy films in the GMR pillar device. Similar behaviour has been observed in over 12 devices.

(a)
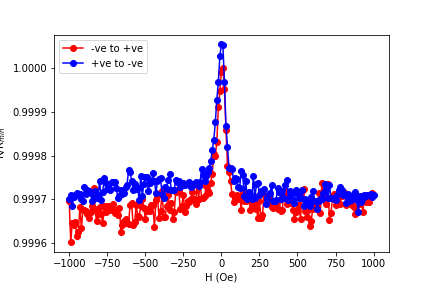
 (b)
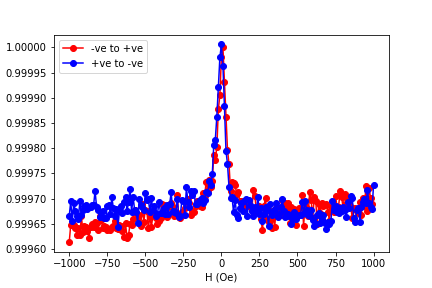


***R*/*R*min (%)**

(c)
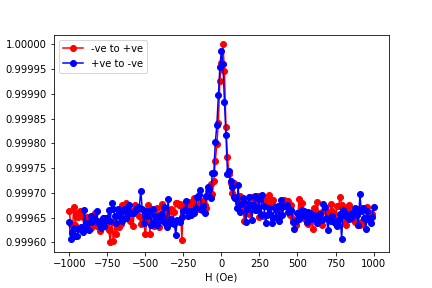
 (d)
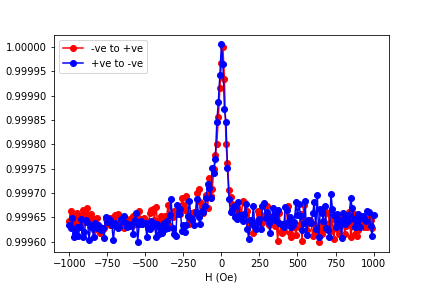


(e)
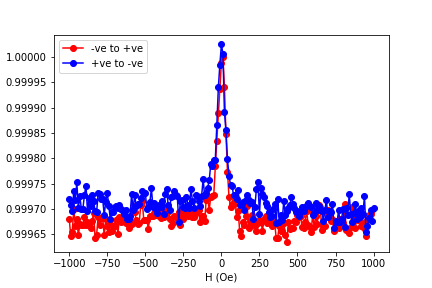
 (f)
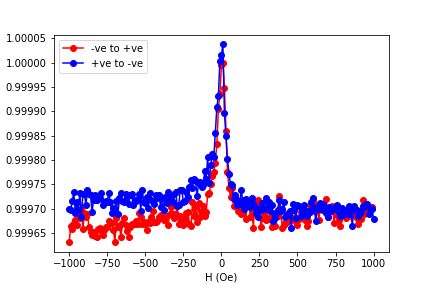


**Figure S1: GMR curves of a CFAS/Ag/CFAS GMR device with the diameter of 150 nm × 100 nm.** | Normalised GMR curves measured under an applied field of ±1 kOe (a) before and after the current crystallisation by an applied current of 50 µA for 1 s (b) once, (c) 3, (d) 10, (e) 20 and (f) 45 times. Red and blue curves correspond to the field sweep from negative to positive and *vice versa*.
